# Supplementary material for: A porous Mn(v) coordination framework with PtS topology: assessment of the influence of a terminal nitride on CO2 sorption
Source: Royal Society of Chemistry journal article supplement (doi:10.1039/c3dt51721g), 2013-01-01
Supplement: c3dt51721g.pdf [file c3dt51721g.pdf]

## Supporting Information for

# A porous Mn(V) coordination framework with PtS topology: assessment of the influence of a terminal nitride on CO<sub>2</sub> sorption

Michael J. Murphy,<sup>a</sup> Deanna M. D'Alessandro<sup>a</sup> and Cameron J. Kepert<sup>\*a</sup>

<sup>a</sup> School of Chemistry, The University of Sydney, Sydney, New South Wales 2006, Australia

## EXPERIMENTAL

**Synthetic methods.** Reagents were used as received from commercial suppliers. [Ph<sub>4</sub>P]<sub>2</sub>[MnN(CN)<sub>4</sub>]·2H<sub>2</sub>O was synthesised according to the method of Bendix *et al.*<sup>1</sup>

**Synthesis of [Zn{MnN(CN)<sub>4</sub>(H<sub>2</sub>O)}]·2H<sub>2</sub>O·MeOH.** [Zn{MnN(CN)<sub>4</sub>(H<sub>2</sub>O)}]·2H<sub>2</sub>O·MeOH was synthesised as a microcrystalline powder by the slow addition of [Ph<sub>4</sub>P]<sub>2</sub>[MnN(CN)<sub>4</sub>]·2H<sub>2</sub>O (0.30 mmol, 250 mg) in 250 ml of 1:1 H<sub>2</sub>O/MeOH into a solution of Zn(NO<sub>3</sub>)<sub>2</sub>·xH<sub>2</sub>O (0.60 mmol, 178 mg) in 250 ml of 1:1 H<sub>2</sub>O/MeOH. The yellow product was filtered, washed successively with water and methanol and dried under vacuum. IR (cm<sup>-1</sup>, n = narrow, b = broad, s = strong, m = medium, w = weak): 3646, 3570 (MeOH n, s), 3351 (H<sub>2</sub>O, b, s), 2178 (νCN, n, s), 1604 (MnN, n, w), 1606 (n, s), 554 (n, s), 455 (n, s). Yield 84%.

Single crystals suitable for diffraction were grown by the slow diffusion of a 1:1 H<sub>2</sub>O/MeOH solution of [Ph<sub>4</sub>P]<sub>2</sub>[MnN(CN)<sub>4</sub>]·2H<sub>2</sub>O into a 1:1 H<sub>2</sub>O/MeOH solution of Zn(NO<sub>3</sub>)<sub>2</sub>·xH<sub>2</sub>O.

**Single crystal X-ray diffraction (SCXRD).** SCXRD measurements were made on an Oxford Supernova diffractometer with Mo-Kα radiation ( $\lambda = 0.71073 \text{ \AA}$ ) at 100 K. Empirical absorption corrections were made using SCALE3 ABSPACK<sup>2</sup>. Structure solutions were obtained using SHELXS-97<sup>3</sup> and refined using SHELXL-97<sup>4</sup> in WinGX<sup>5</sup>. Atoms were refined anisotropically where meaningful, with the nitride and coordinated water oxygen sites constrained to have identical anisotropic ADPs due to their partial overlap with reflection in the *ac*-plane; atoms of the cyanide bridge were refined isotropically due to their close proximity to this mirror plane.

Based on an expectation that long-range ordering of the MnN(CN)<sub>4</sub>(H<sub>2</sub>O) unit might be favoured by the adoption of a more regular tetrahedral geometry at the Zn centre and/or to cross-pore intraframework and framework-guest interactions, lower symmetry structural models were explored for this material, particularly those with alternating alignment of the nitride unit along the *a* and *b* axes of the parent cell so as to relieve local strain at the Zn site (requiring unit cell modulation). Reduction of the diffraction data in the  $a' = \sqrt{2}a = 10.6223$ ,  $c' = c$  supercell and examination of precession images provided no evidence for long-range modulation, with solution and refinement in  $P4_2/mnm$  (in which the *ac*-mirror planes in the parent  $P4_2/mmc$  cell are absent) yielding an inferior refinement to the higher symmetry disordered model in the parent cell;

50:50 disorder of the Mn site was still present in this solution. Pore volumes were calculated using a disorder-free model within this space group within PLATON.<sup>6</sup>

CCDC 933557 contains the supplementary crystallographic data for this paper. These data can be obtained free of charge from The Cambridge Crystallographic Data Centre via [www.ccdc.cam.ac.uk/data\\_request/cif](http://www.ccdc.cam.ac.uk/data_request/cif).

**Powder X-ray diffraction (PXRD).** PXRD data was collected over the 5 - 80° 2 $\theta$  range with a 0.02° step size and 2°/min scan rate on a PANalytical X'Pert Pro diffractometer fitted with a solid-state PIXcel detector (40 kV, 30 mA, 1° divergence and anti-scatter slits, and 0.3 mm receiver and detector slits) using Cu-K $\alpha$  ( $\lambda$  = 1.5406 Å) radiation. Profile fits were made using the Le Bail method in Rietica.

**Thermogravimetric analysis (TGA).** TGA measurements were carried out on a TA Instruments Hi-Res TGA 2950 Thermogravimetric Analyser. Dry N<sub>2</sub> flowed through the system (0.1 L/min) during data collection. To identify the approximate temperatures of guest loss and thermal decomposition, the sample temperature was heated at 0.75 °C/min from 25 to 700 °C. Samples were loaded dry after exposure to air.

**Gas adsorption.** Adsorption isotherms were measured using an Accelerated Surface Area & Porosimetry System (ASAP) 2020 supplied by Micromeritics Instruments Inc. Approximately 50 mg of the sample was loaded into a glass analysis tube and outgassed for 24 h under vacuum at 90 °C prior to measurement. N<sub>2</sub> adsorption and desorption isotherms were measured at 77 K and data was analysed using BET models to determine the surface area.<sup>7</sup> CO<sub>2</sub> and H<sub>2</sub> measurements were carried out on the ASAP2020 as described above. The isosteric heat of adsorption for CO<sub>2</sub> was determined by interpolating carbon dioxide isotherms at 298, 308 and 318 K. Isosteric heat of adsorption calculations ( $-Q_{st}$ ) for CO<sub>2</sub> at these temperatures were undertaken using the Clausius-Clapeyron equation with direct interpolation of data points.

**Solid-state Fourier transform infrared (FTIR) spectroscopy.** Fourier transform infrared (FTIR) spectra were collected in a potassium bromide (KBr) matrix over the range 4000-400 cm<sup>-1</sup> using a Varian FTS-800 Scimitar series infrared spectrometer. KBr was heated at 400 K under vacuum for 24 h prior to analysis, with 2-4 mg of material per 200 mg of KBr used for each measurement. A KBr background scan was obtained before each new scan and subtracted from the sample scan to obtain a difference spectrum.

**Diffuse reflectance infrared Fourier transformed spectroscopy (DRIFTS).** *In situ* diffuse reflectance infrared Fourier transform spectroscopy (DRIFTS) was performed on samples in a potassium bromide matrix over the range 4000-400 cm<sup>-1</sup> using a Harrick Scientific Products, Inc. Praying Mantis attachment on a Bruker Tensor 27 FT-IR spectrometer. The Praying Mantis was mounted with a Low Temperature Reaction Chamber fitted with ZnSe windows and a Harrick Scientific Products, Inc. Temperature Controller. The sample was heated at 90 °C under vacuum for 16 h prior to analysis. High purity CO<sub>2</sub> (99.99%) was introduced at a range of pressures, and 1600 scans of the sample were recorded and averaged at each pressure dose.

**Catalysis measurements.**  $[\text{Zn}\{\text{MnN}(\text{CN})_4(\text{H}_2\text{O})\}] \cdot 2\text{H}_2\text{O} \cdot \text{MeOH}$  (1 mol%),  $\text{CH}_3\text{CN}$  (1 ml), cyclopentene (1 mmol) and  $\text{H}_2\text{O}_2$  (30% w/v in  $\text{H}_2\text{O}$ ) (2 equiv.) were combined under an inert atmosphere at 23 °C. The reaction was monitored by Head Space Solid Phase Microextraction (HS-SPME) and a Finnigan PolarisQ mass spectrometer attached to a ThermoQuest trace gas chromatograph fitted with a 30 m × 0.25 mm × 0.25 mm Zebron DB5 MS column.

**Table S1 Crystal data and structure refinement for  $[\text{Zn}\{\text{MnN}(\text{CN})_4(\text{H}_2\text{O})\}]\cdot 2\text{H}_2\text{O}\cdot \text{MeOH}$**

|                                                     |                                                          |
|-----------------------------------------------------|----------------------------------------------------------|
| Empirical formula                                   | $\text{C}_5\text{H}_{10}\text{MnN}_5\text{O}_4\text{Zn}$ |
| Formula weight                                      | 324.49                                                   |
| Temperature / K                                     | 100(2)                                                   |
| Crystal system                                      | tetragonal                                               |
| Space group                                         | $P4_2/mmc$                                               |
| $a / \text{\AA}$                                    | 7.51110(10)                                              |
| $b / \text{\AA}$                                    | 7.51110(10)                                              |
| $c / \text{\AA}$                                    | 13.4593(5)                                               |
| $\alpha / ^\circ$                                   | 90.00                                                    |
| $\beta / ^\circ$                                    | 90.00                                                    |
| $\gamma / ^\circ$                                   | 90.00                                                    |
| Volume / $\text{\AA}^3$                             | 759.33(3)                                                |
| Z                                                   | 2                                                        |
| $\rho_{\text{calc}} / \text{mg}\cdot\text{mm}^{-3}$ | 1.419                                                    |
| $\mu / \text{mm}^{-1}$                              | 2.416                                                    |
| $F(000)$                                            | 324.0                                                    |
| Crystal size / $\text{mm}^3$                        | $0.157 \times 0.093 \times 0.077$                        |
| 2 $\theta$ range for data collection                | 9.78 to 52.68 $^\circ$                                   |
| Index ranges                                        | $-9 \leq h \leq 9, -9 \leq k \leq 9, -16 \leq l \leq 16$ |
| Reflections collected                               | 11832                                                    |
| Independent reflections                             | 469 [R(int) = 0.0413]                                    |
| Data/restraints/parameters                          | 469/1/27                                                 |
| Goodness-of-fit on $F^2$                            | 1.110                                                    |
| Final R indices [ $I \geq 2\sigma(I)$ ]             | $R_1 = 0.0428, wR_2 = 0.1218$                            |
| Final R indices [all data]                          | $R_1 = 0.0446, wR_2 = 0.1233$                            |
| Largest diff. peak/hole / $e \text{\AA}^{-3}$       | 1.08/-0.24                                               |

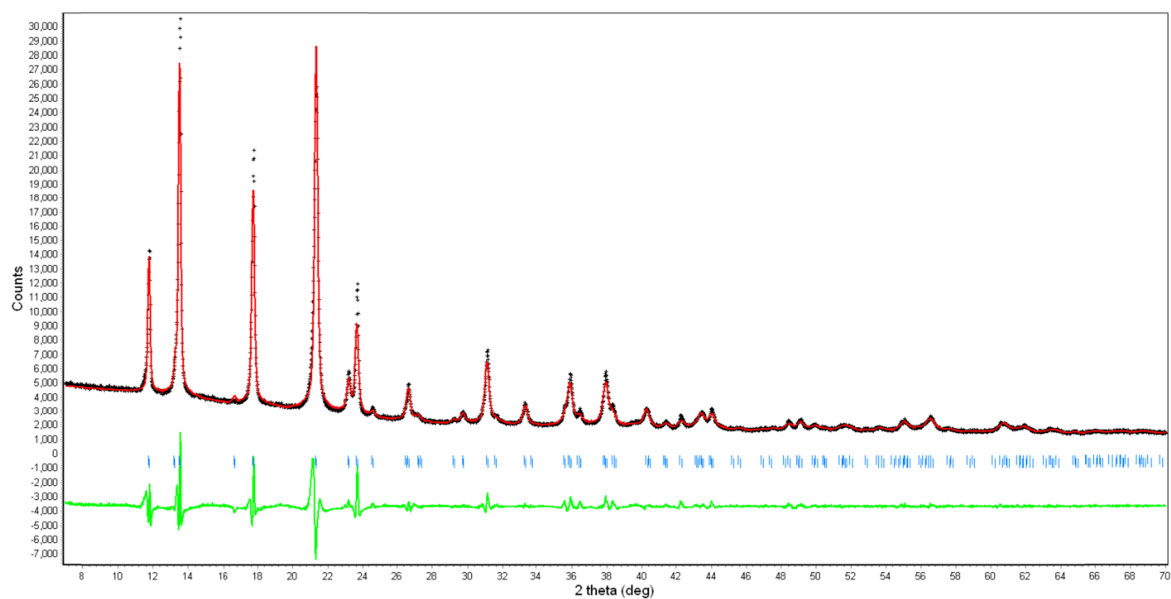

**Figure S1** Le Bail extraction of the PXRD pattern for  $[\text{Zn}\{\text{MnN}(\text{CN})_4(\text{H}_2\text{O})\}]\cdot 2\text{H}_2\text{O}\cdot \text{MeOH}$  at 293 K; unit cell parameters  $a = 7.5145(5)$ ,  $c = 13.3846(10)$  Å,  $V = 755.82(10)$  Å<sup>3</sup>.

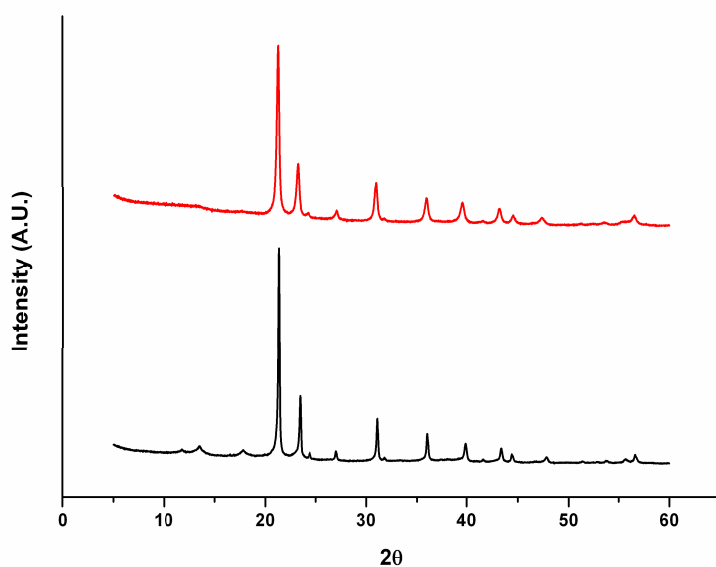

**Figure S2** PXRD of  $[\text{Zn}\{\text{MnN}(\text{CN})_4(\text{MeOH})\}]$  before (black line) and after (red line) porosimetry measurements. Unit cells by Le Bail refinement:  $a = 7.6083(12)$ ,  $c = 13.262(2)$  Å,  $V = 767.7(2)$  Å<sup>3</sup> (black);  $a = 7.6340(11)$ ,  $c = 13.256(2)$  Å,  $V = 772.6(2)$  Å<sup>3</sup> (red).

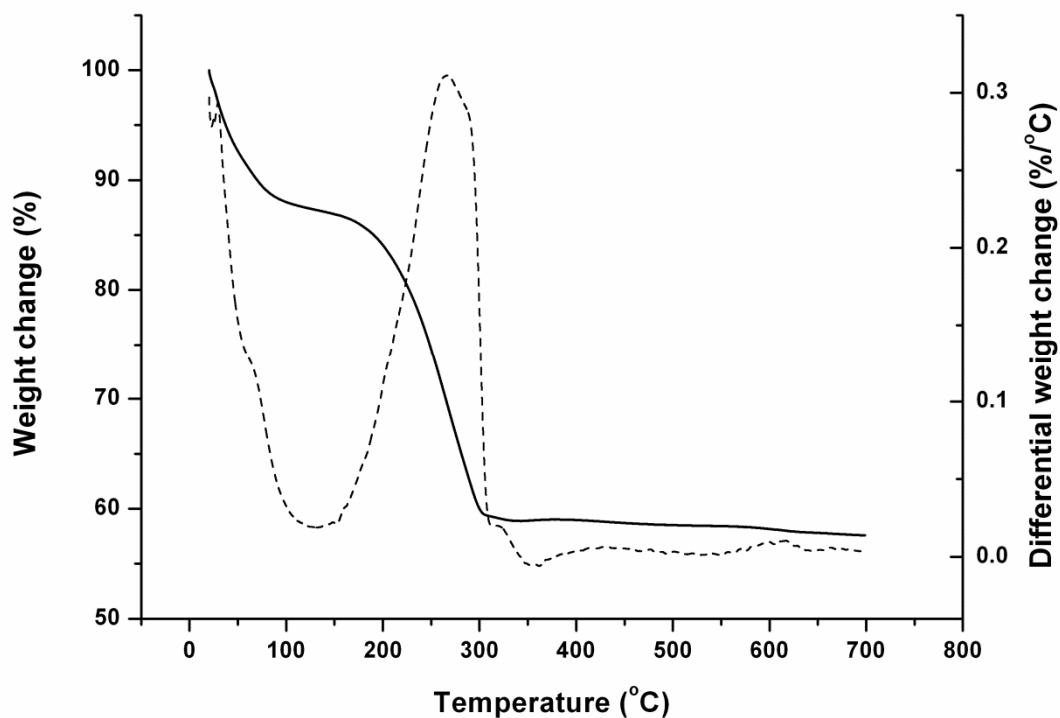

**Figure S3** TGA of an air-dried sample of  $[\text{Zn}\{\text{MnN}(\text{CN})_4(\text{H}_2\text{O})\}]\cdot 2\text{H}_2\text{O}\cdot \text{MeOH}$  heated at a rate of  $0.75\text{ }^\circ\text{C}/\text{min}$  under a nitrogen atmosphere; solid line represents change in weight (%), broken line represents the first derivative of the solid line.

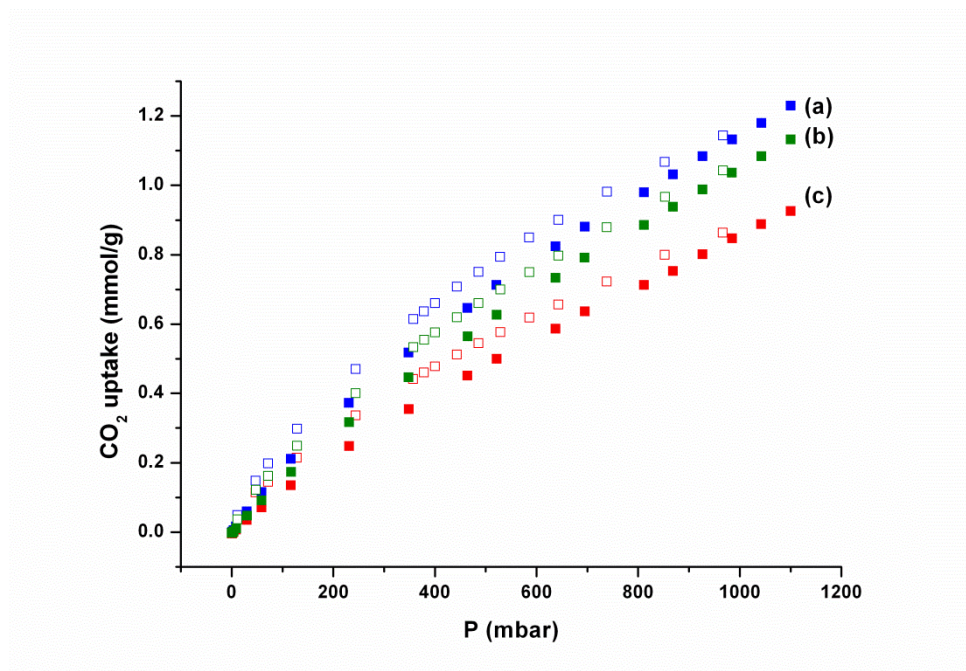

**Figure S4**  $\text{CO}_2$  adsorption (filled squares) and desorption (open squares) isotherms measured at (a) 298, (b) 308 and (c) 318 K for  $[\text{Zn}\{\text{MnN}(\text{CN})_4(\text{MeOH})\}]$ .

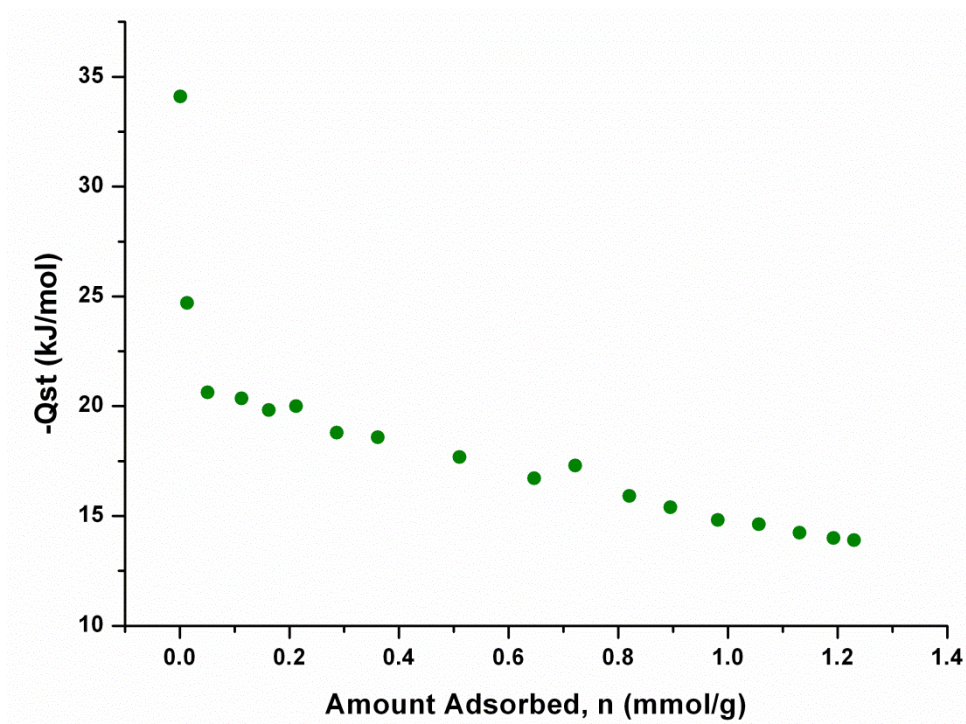

**Figure S5** Calculated isosteric heat of adsorption of CO<sub>2</sub> in [Zn{MnN(CN)<sub>4</sub>(MeOH)}] as a function of coverage.

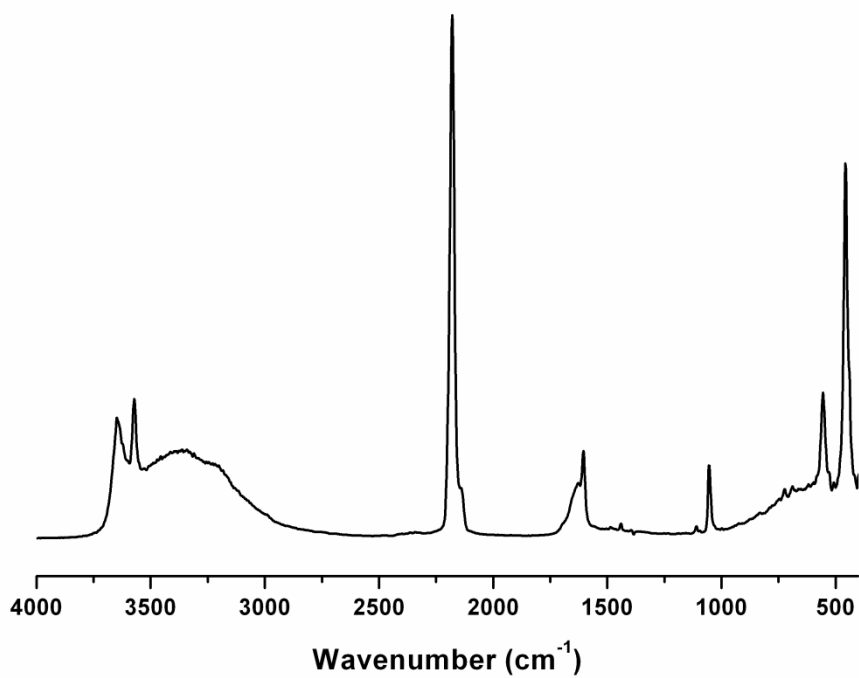

**Figure S6** FTIR spectrum of [Zn{MnN(CN)<sub>4</sub>(H<sub>2</sub>O)}]·2H<sub>2</sub>O·MeOH

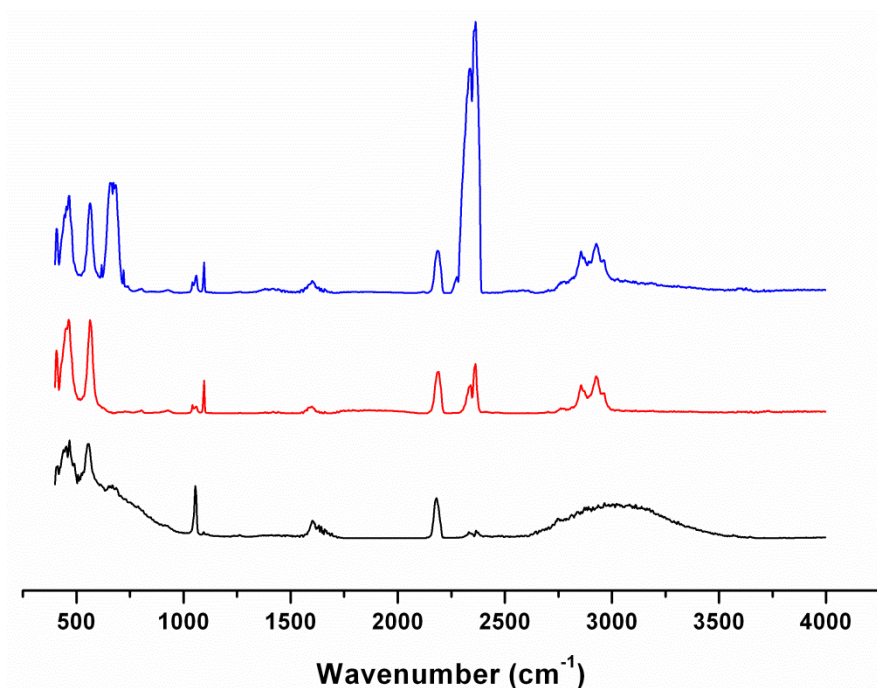

**Figure S7** DRIFTS spectra of the as-made sample  $[\text{Zn}\{\text{MnN}(\text{CN})_4(\text{H}_2\text{O})\}] \cdot 2\text{H}_2\text{O} \cdot \text{MeOH}$  (black);  $[\text{Zn}\{\text{MnN}(\text{CN})_4(\text{MeOH})\}]$ , obtained by MeOH-washing and subsequent heating of the as-made sample to 90 °C under vacuum (red), in air; and  $[\text{Zn}\{\text{MnN}(\text{CN})_4(\text{MeOH})\}]$  under 1 bar of  $\text{CO}_2$  (blue).

**Table S2** Catalysis results from the conversion of cyclopentene to cyclopentene oxide by  $[\text{Zn}\{\text{MnN}(\text{CN})_4(\text{H}_2\text{O})\}] \cdot 2\text{H}_2\text{O} \cdot \text{MeOH}$

| Reaction medium |                                   |                             | Supernatant aliquot                 |                                   |                             |
|-----------------|-----------------------------------|-----------------------------|-------------------------------------|-----------------------------------|-----------------------------|
| Time (hours)    | [cyclopentene oxide] (M) detected | Conversion (%) <sup>a</sup> | Time after catalyst removed (hours) | [cyclopentene oxide] (M) detected | Conversion (%) <sup>a</sup> |
| 0               | 0                                 | 0                           | 0                                   | 0.0010                            | 1                           |
| 1               | 0.0001                            | 0                           | 18                                  | 0.0343                            | 11                          |
| 2.5             | 0.0002                            | 0                           | 21                                  | 0.0747                            | 23                          |
| 3               | 0.0010                            | 1                           |                                     |                                   |                             |
| 21              | 0.0785                            | 25                          |                                     |                                   |                             |
| 24              | 0.1688                            | 53                          |                                     |                                   |                             |

<sup>a</sup> Conversion (%) based on [cyclopentene] identified at time = 0 by GC-MS



## REFERENCES

1. J. Bendix, K. Meyer, T. Weyhermuller, E. Bill, N. Metzler-Nolte and K. Wieghardt, *Inorganic Chemistry*, 1998, **37**, 1767-1775.
2. SCALE3 ABSPACK: Empirical absorption correction CrysAlis Software package. Oxford Diffraction Ltd.
3. G. M. Sheldrick, *SHELXS-97. Program for crystal structure solution*, University of Göttingen, Germany, 1997.
4. G. M. Sheldrick, *SHELXL-97. Program for crystal structure refinement*, University of Göttingen, Germany, 1997.
5. L. J. Farrugia, *Journal of Applied Crystallography*, 1999, **32**, 837-838.
6. A.L.Spek, *J.Appl.Cryst.* 2003, **36**, 7-13.
7. S. Brunauer, P. H. Emmett and E. Teller, *Journal of the American Chemical Society*, 1938, **60**, 309-319.
